# Supplementary material for: Multiple phytohormone signalling pathways modulate susceptibility of tomato plants to Alternaria alternata f. sp. lycopersici
Source: PubMed Central journal article supplement — J Exp Bot. 2013 Jan 31;64(2):637–50. doi: 10.1093/jxb/ers360 (PMC3542053; doi:10.1093/jxb/ers360), 2013-01-31

Multiple phytohormone signaling pathways modulate disease resistance of tomato plants to *Alternaria alternata* f. sp. *Lycopersici*.

Chengguo Jia, Liping Zhang, Lihong Liu, Jiansheng Wang, Chuanyou Li, Qiaomei Wang. *Journal of Experimental Botany*

## SUPPLEMENTARY MATERIAL

**Figure S1.** Transcription patterns of the JA-biosynthetic genes *AOS2* (A) and *LOXD* (B) and the JA-regulated gene *PI-II* (C) in the leaves of *jail* and CM at 0, 1, 3, and 5 d post AAL infection. Error bars indicate standard deviation.

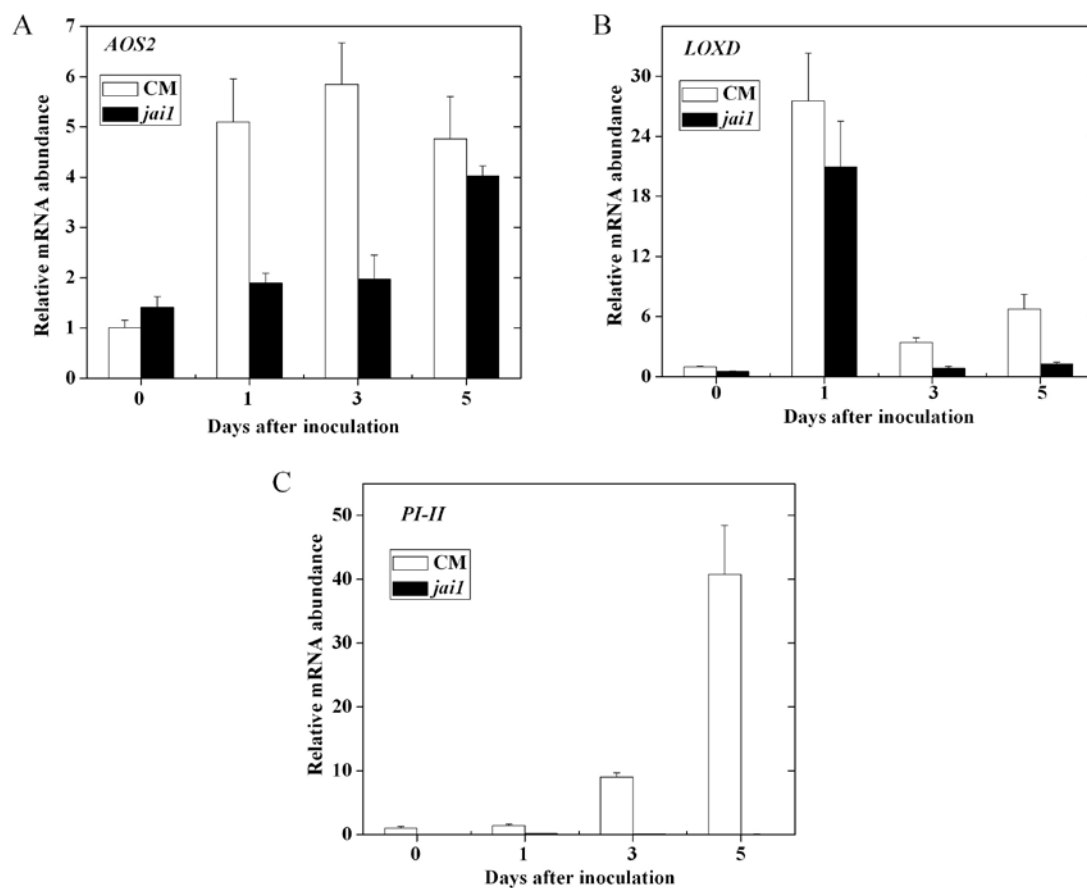

**Figure S2. The effect of various concentrations of CoCl<sub>2</sub> (A) and STS (B) application on the disease development in CM plants.** Error bars indicate standard deviation from the mean of three replicates. Asterisks indicate significant differences as compared with the water-treated control at the same time point (\**P* < 0.05; Student's *t*-test). The experiment was repeated twice and similar results were obtained.

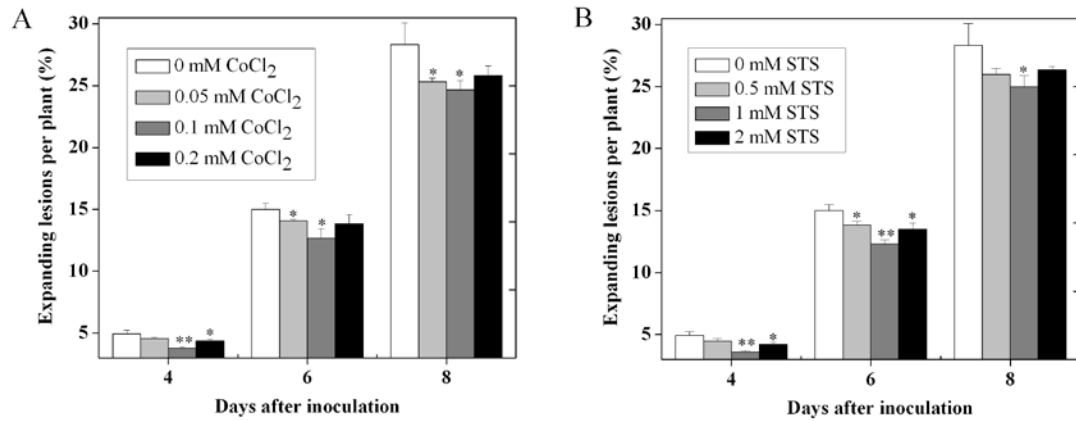

**Figure S3. Symptom of CM leaflets after 0.2 μM AAL-toxin application or co-treatment with AAL-toxin and 0.2 mM SA.** Detached leaflets were incubated under continuous light at 25 °C for 72 h.

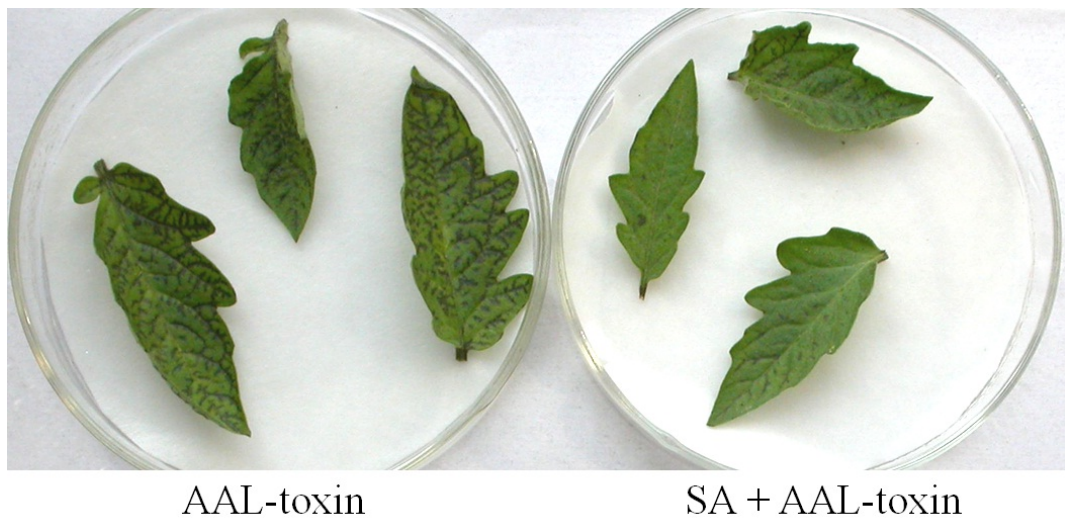

**Figure S4. Transcription patterns of SA-biosynthetic genes (*PAL* and *ICS*) and JA-regulated genes (*NPR1* and *PR1a*) in the leaves of *jail* and CM at 0, 1, 3, and 5 d post AAL infection. Error bars indicate standard deviation.**

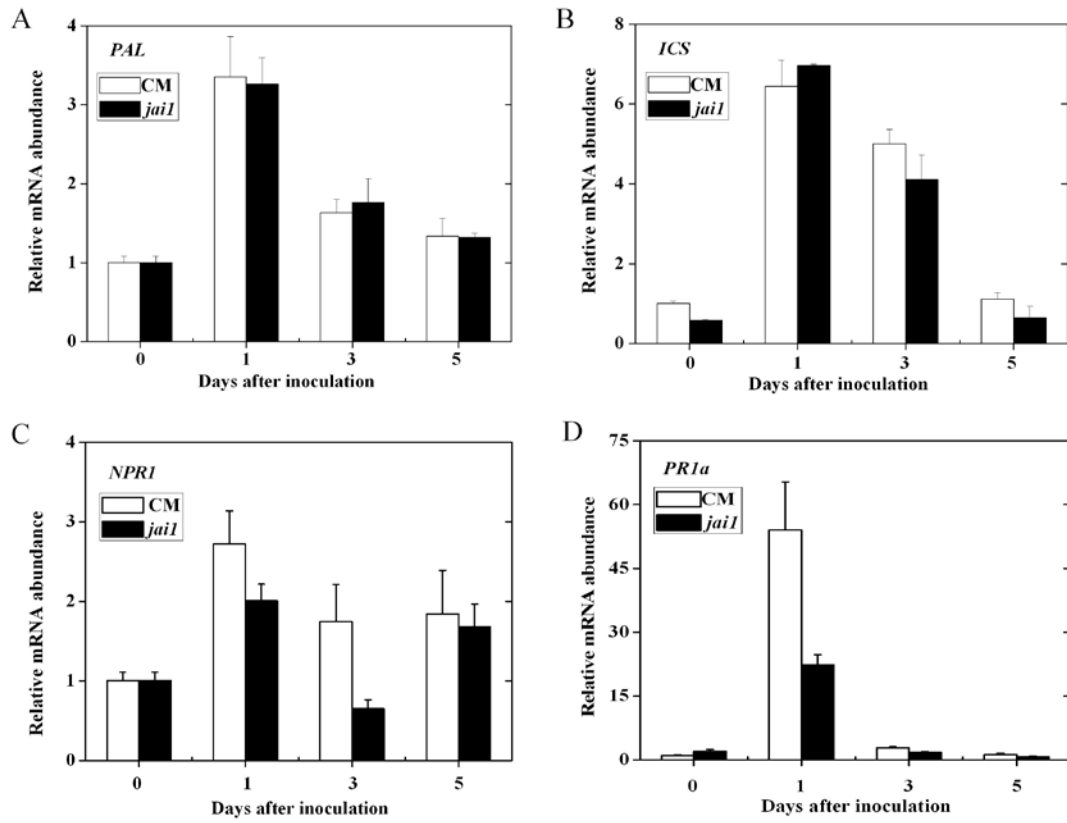

Supplement: supp_ers360_jexbot090993_file001.pdf [file supp_ers360_jexbot090993_file001.pdf]
